# Supplementary material for: Conformational dynamics and mechanical properties of biomimetic RNA, DNA, and RNA–DNA hybrid nanotubes: an atomistic molecular dynamics study
Source: Royal Society of Chemistry journal article supplement (doi:10.1039/d3cp01028g), 2023-01-01
Supplement: d3cp01028g1.pdf [file d3cp01028g1.pdf]

## SUPPLEMENTARY INFORMATION

### Conformational Dynamics and Mechanical Properties of Biomimetic RNA, DNA, and RNA-DNA Hybrid Nanotubes: An Atomistic Molecular Dynamics Study

Ehsan Torkan<sup>1</sup>, Mehdi Salmani-Tehrani<sup>1\*</sup>

<sup>1</sup> Department of Mechanical Engineering, Isfahan University of Technology, Isfahan, 84156-83111, Iran.

\*Corresponding author. Email: [Tehrani@iut.ac.ir](mailto:Tehrani@iut.ac.ir).

**Table S1** Genome sequences of RNA oligos of nanotubes. The genome sequences of DNA oligos are similar to those of RNA oligos, with the exception of the substitution of uracil (U) with thymine (T).

| Strand number | Strand type | Genome sequence                                                    |
|---------------|-------------|--------------------------------------------------------------------|
| 1             | Scaffold    | 5'-AUCCUGGUCGAGCUGGACGGCGACGUAAACGGCCACAAGU<br>UCAGCGUGUCCGGCGA-3' |
| 2             | Scaffold    | 5'-CAUCUGCACCACCGGCAAGCUGCCCGUGCCCUGGCCACC<br>CUCGUGACCACCCUGA-3'  |
| 3             | Scaffold    | 5'-UCCAGGAGCGCACCAUCUUCUUAAGGACGACGGCAACU<br>ACAAGACCCGCGCCGAG-3'  |
| 4             | Scaffold    | 5'-AAGGGCAUCGACUUAAGGAGGACGGCAACAUCUGGG<br>GCACAAGCUGGAGUACAA-3'   |
| 5             | Scaffold    | 5'-GGACGGCAGCGUGCAGCUCGCCGACCACUACCAGCAGA<br>ACACCCCAUCGGCGACG-3'  |
| 6             | Scaffold    | 5'-CCGCCCUGAGCAAAGACCCCAACGAGAAGCGCGAUCAC<br>AUGGUCCUGCUGGAGUUC-3' |
| 7             | Staple      | 5'-GCCGUCGUGCCGUCGUGGUAGUGGUCGAUCGCGCUU<br>ACGUC-3'                |
| 8             | Staple      | 5'-GCCGUCCGAACUCCCCAGGAU-3'                                        |
| 9             | Staple      | 5'-UGGGGUCGUGUUCUCUCCUUGAAGUCGACGGGUCUCG<br>GUGGU-3'               |
| 10            | Staple      | 5'-UUGUACUUCCUGGAUCAGGGU-3'                                        |
| 11            | Staple      | 5'-GAUGGGGUUUGCUCACACGCUGAACUUGAGCUUGCU<br>GUAGUU-3'               |
| 12            | Staple      | 5'-GGUCACGAGCUCGAAGCAGGACCAUGUGGCGAGCUGU<br>GCCCC-3'               |
| 13            | Staple      | 5'-CUCGGCGUGCCCUUCGUCGCC-3'                                        |
| 14            | Staple      | 5'-GCCGUCCAGGGUGGAGAAGAUGGUGCGCCAGCUUG<br>CACGCU-3'                |
| 15            | Staple      | 5'-AGGAUGUCCUUGAGCCAGGGCACGGGUCGGCCGUUU<br>CUCGU-3'                |
| 16            | Staple      | 5'-GCAGAUGUCGCCGGAGGGCGG-3'                                        |

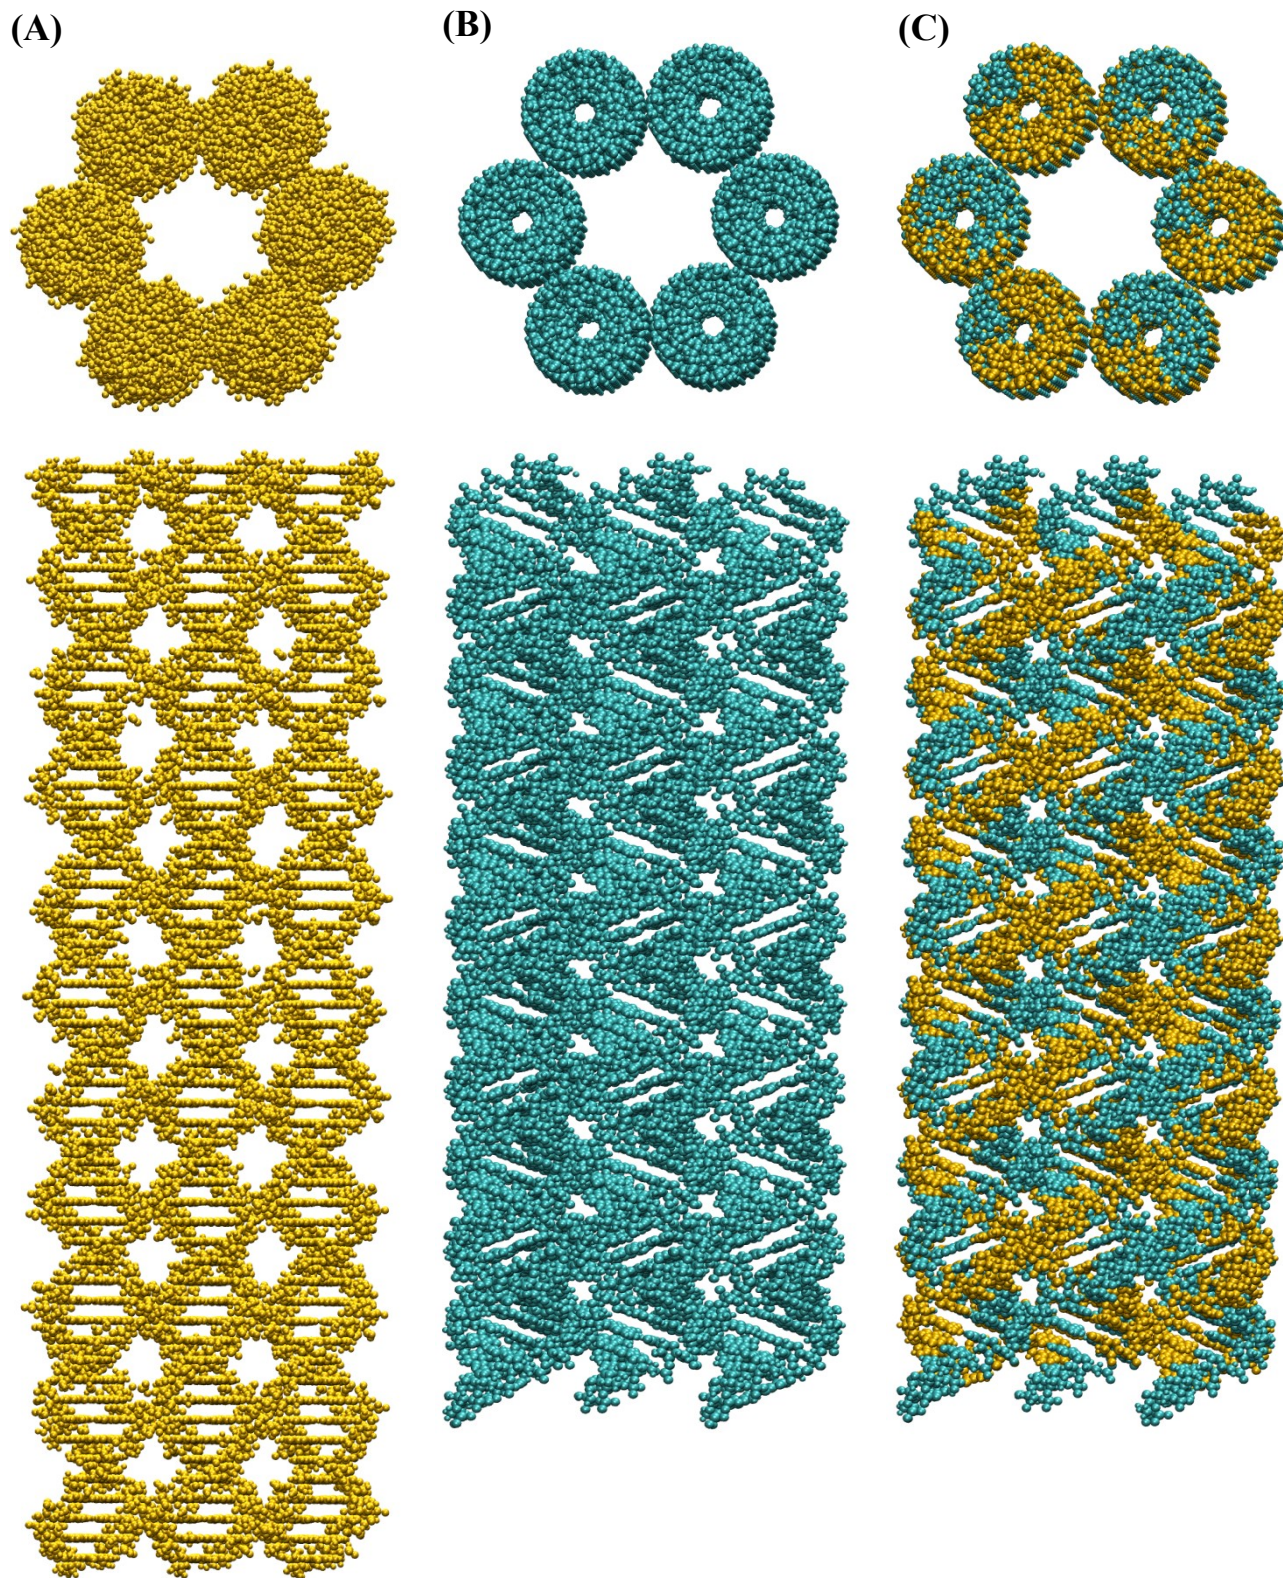

**Figure S1** Top and side views of the initially built models of (A) DNT, (B) RNT, and (C) RDHNT.

**Table S2** Details of the simulated systems in equilibrium MD simulations.

| Structure | Box size (nm <sup>3</sup> ) | No. of base pairs | No. of water molecules | No. of Na <sup>+</sup> molecules | No. of atoms total (nanotube) |
|-----------|-----------------------------|-------------------|------------------------|----------------------------------|-------------------------------|
| DNT       | 10×10×22                    | 336               | 64311                  | 656                              | 214865(21276)                 |
| RNT       | 10.5×10.5×19                | 336               | 61084                  | 656                              | 205484(21576)                 |
| RDHNT     | 10.5×10.5×19                | 336               | 61196                  | 656                              | 205721 (21477)                |

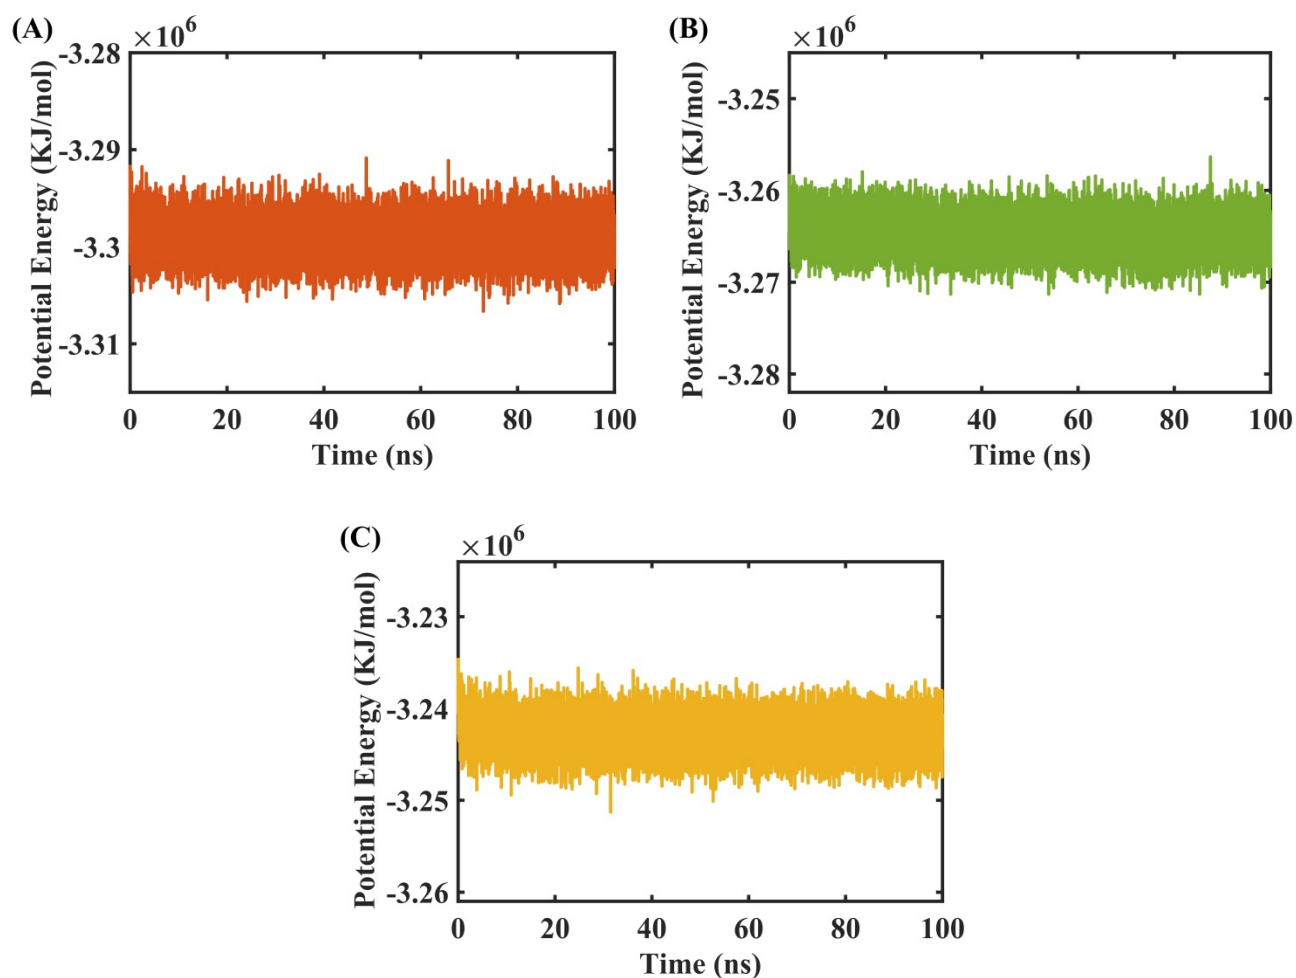

**Figure S2** Potential energy of systems containing (A) DNT, (B) RNT, and (C) RDHNT.

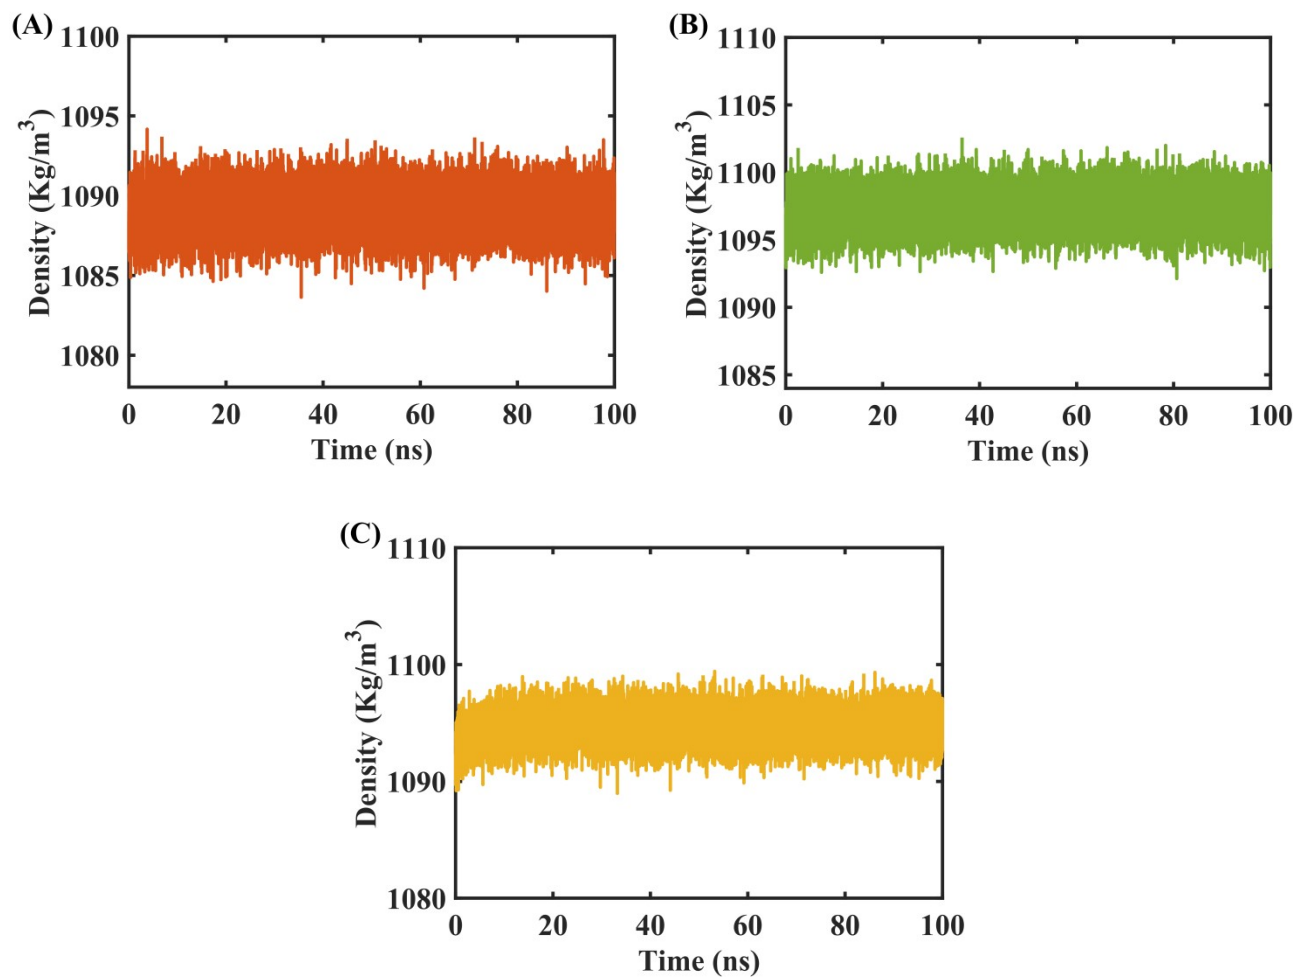

**Figure S3** Density of systems containing (A) DNT, (B) RNT, and (C) RDHNT.

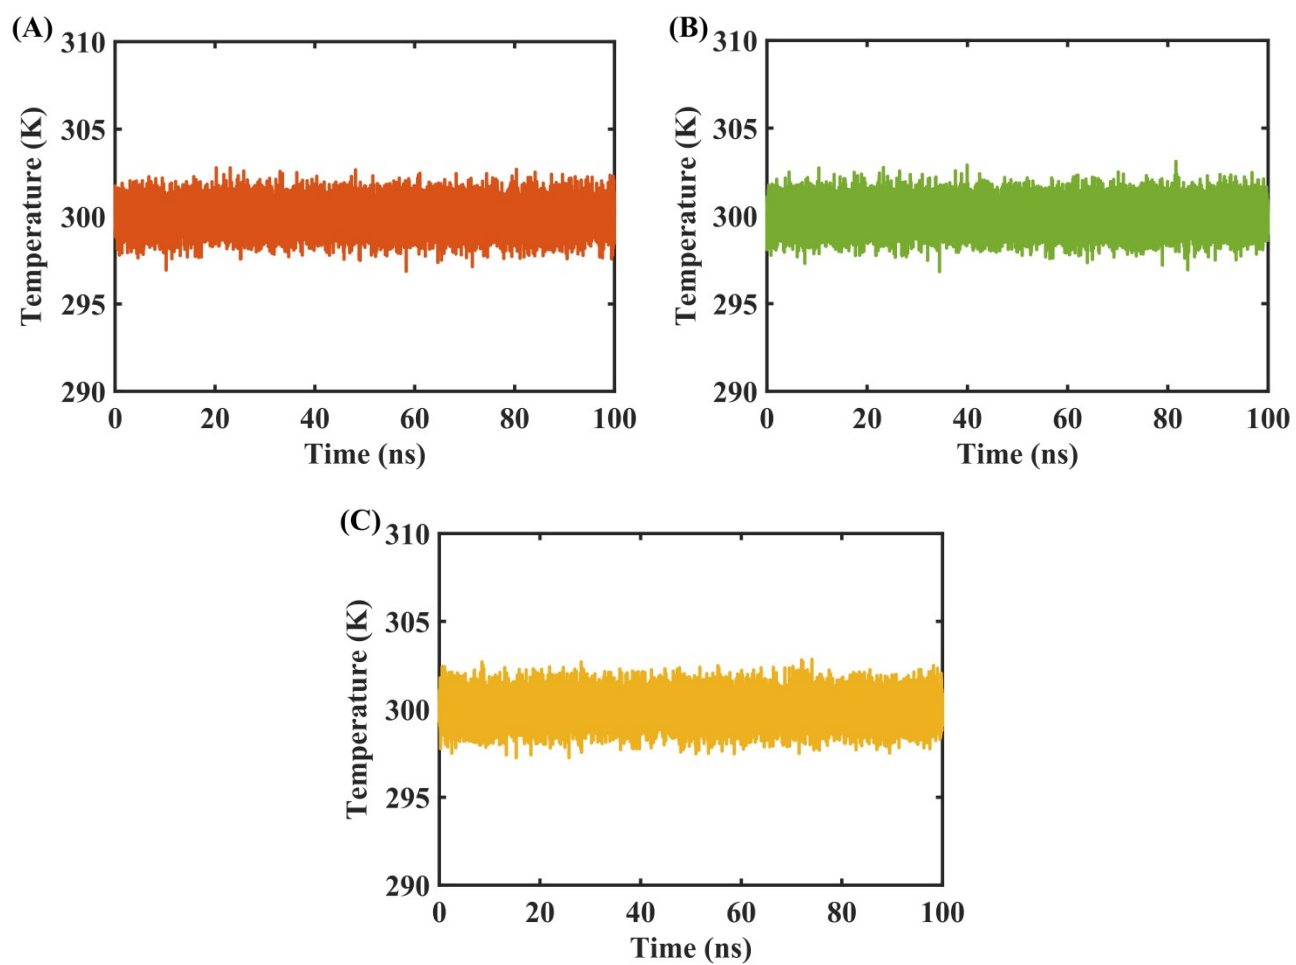

**Figure S4** Temperature of systems containing (A) DNT, (B) RNT, and (C) RDHNT.

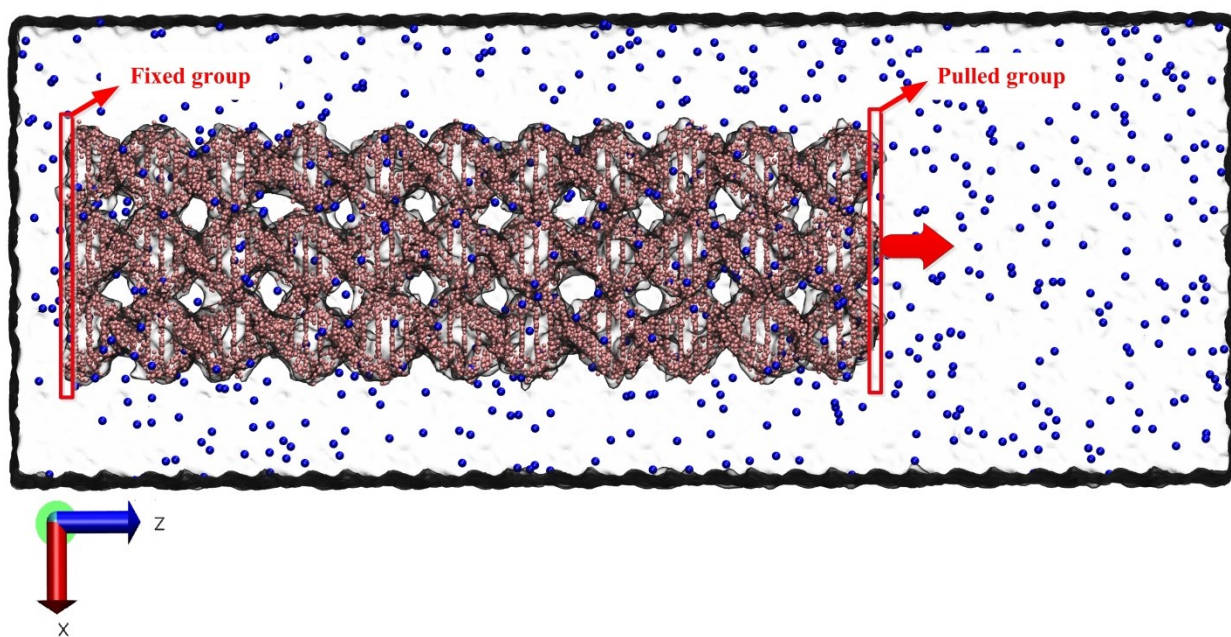

**Figure S5** Atomistic structure of a nucleic acid nanotube subjected to tensile force.

**Table S3** Details of the simulated systems in non-equilibrium SMD simulations.

| Structure | Box size (nm <sup>3</sup> ) | No. of water molecules | No. of Na <sup>+</sup> molecules | No. of total atoms |
|-----------|-----------------------------|------------------------|----------------------------------|--------------------|
| DNT       | 10×10×28                    | 83924                  | 656                              | 273704             |
| RNT       | 10.5×10.5×28                | 93729                  | 656                              | 303419             |
| RDHNT     | 10.5×10.5×28                | 93767                  | 656                              | 303434             |

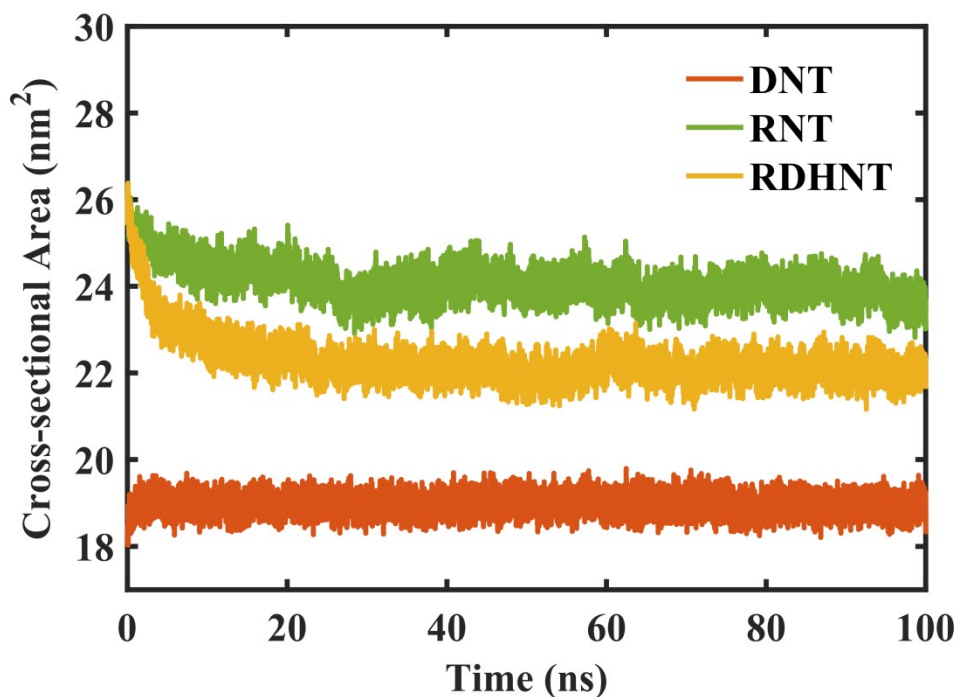

**Figure S6** Variations in cross-sectional area over time for DNT, RNT, and RDHNT. The cross-sectional area was calculated by dividing the nanotube's volume by its contour length, using the formula  $A=V(t)/L_c(t)$ .

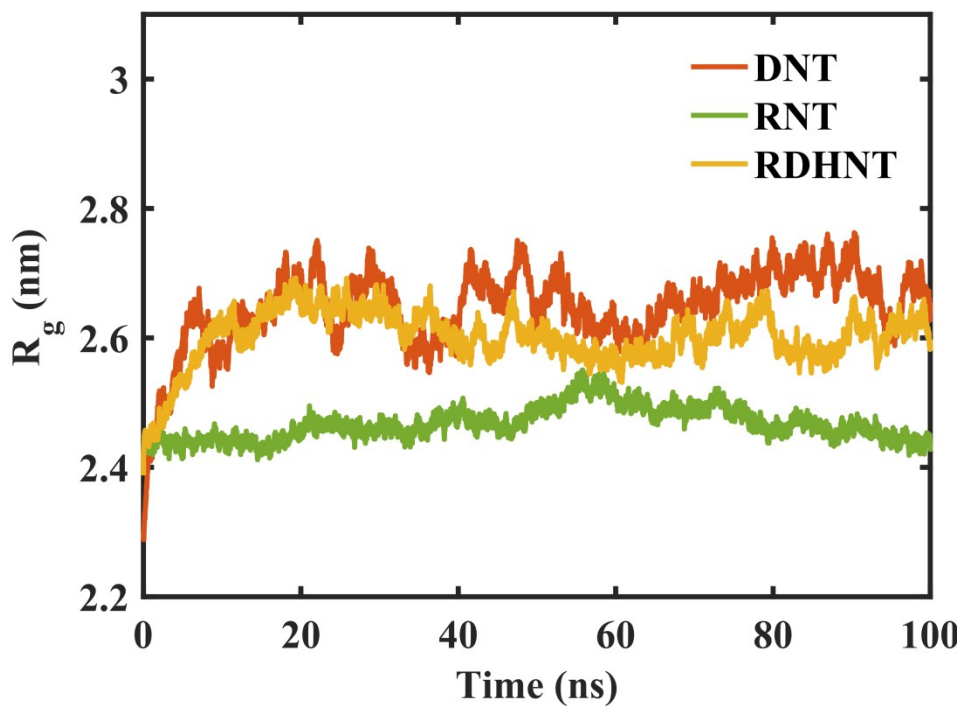

**Figure S7** The time evolutions of the radius of gyration ( $R_g$ ) for nucleic acid nanotubes.

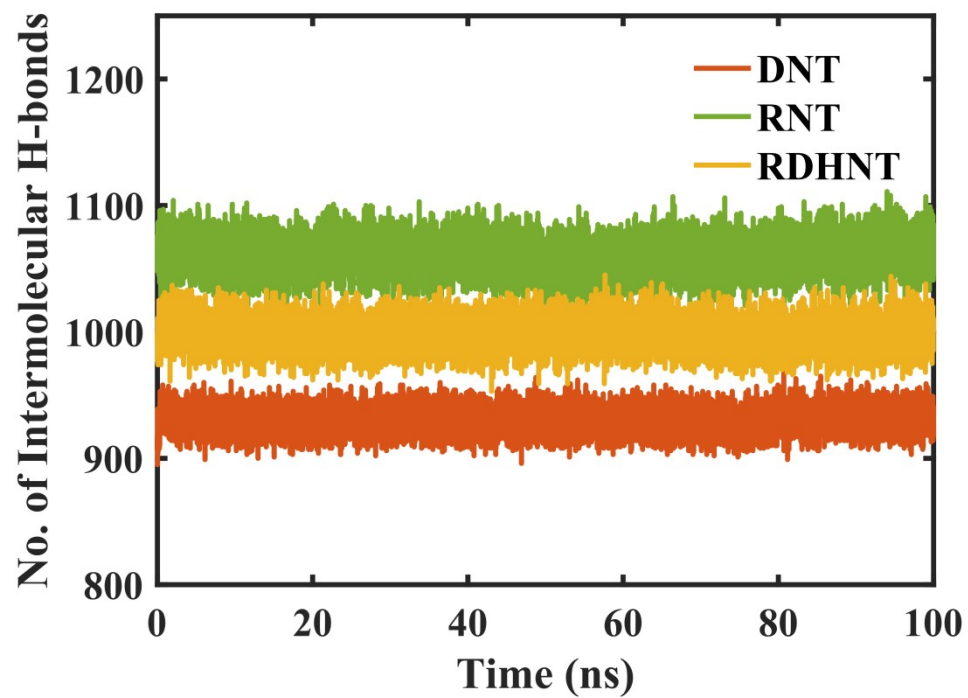

**Figure S8** The number of intermolecular hydrogen bonds in DNT, RNT, and RDHNT versus time.



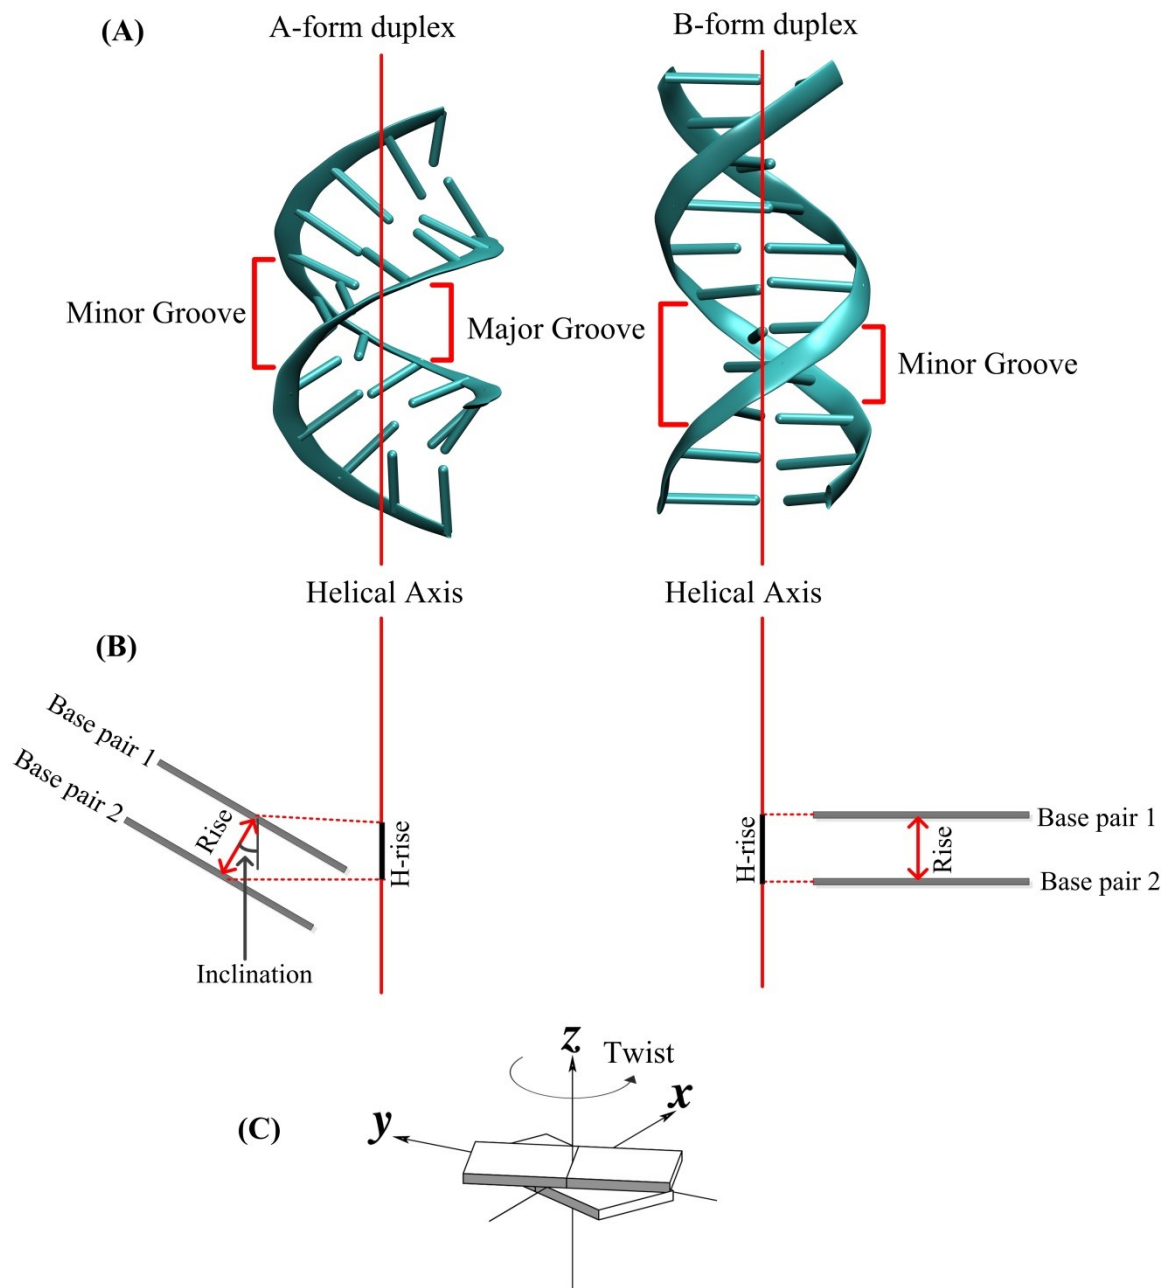

**Figure S9** (A) schematics of A-form and B-form duplexes showing major and minor grooves, (B) examples of rise, H-rise, and inclination between consecutive base pairs, and (C) an illustration of the twist between two adjacent base pairs.

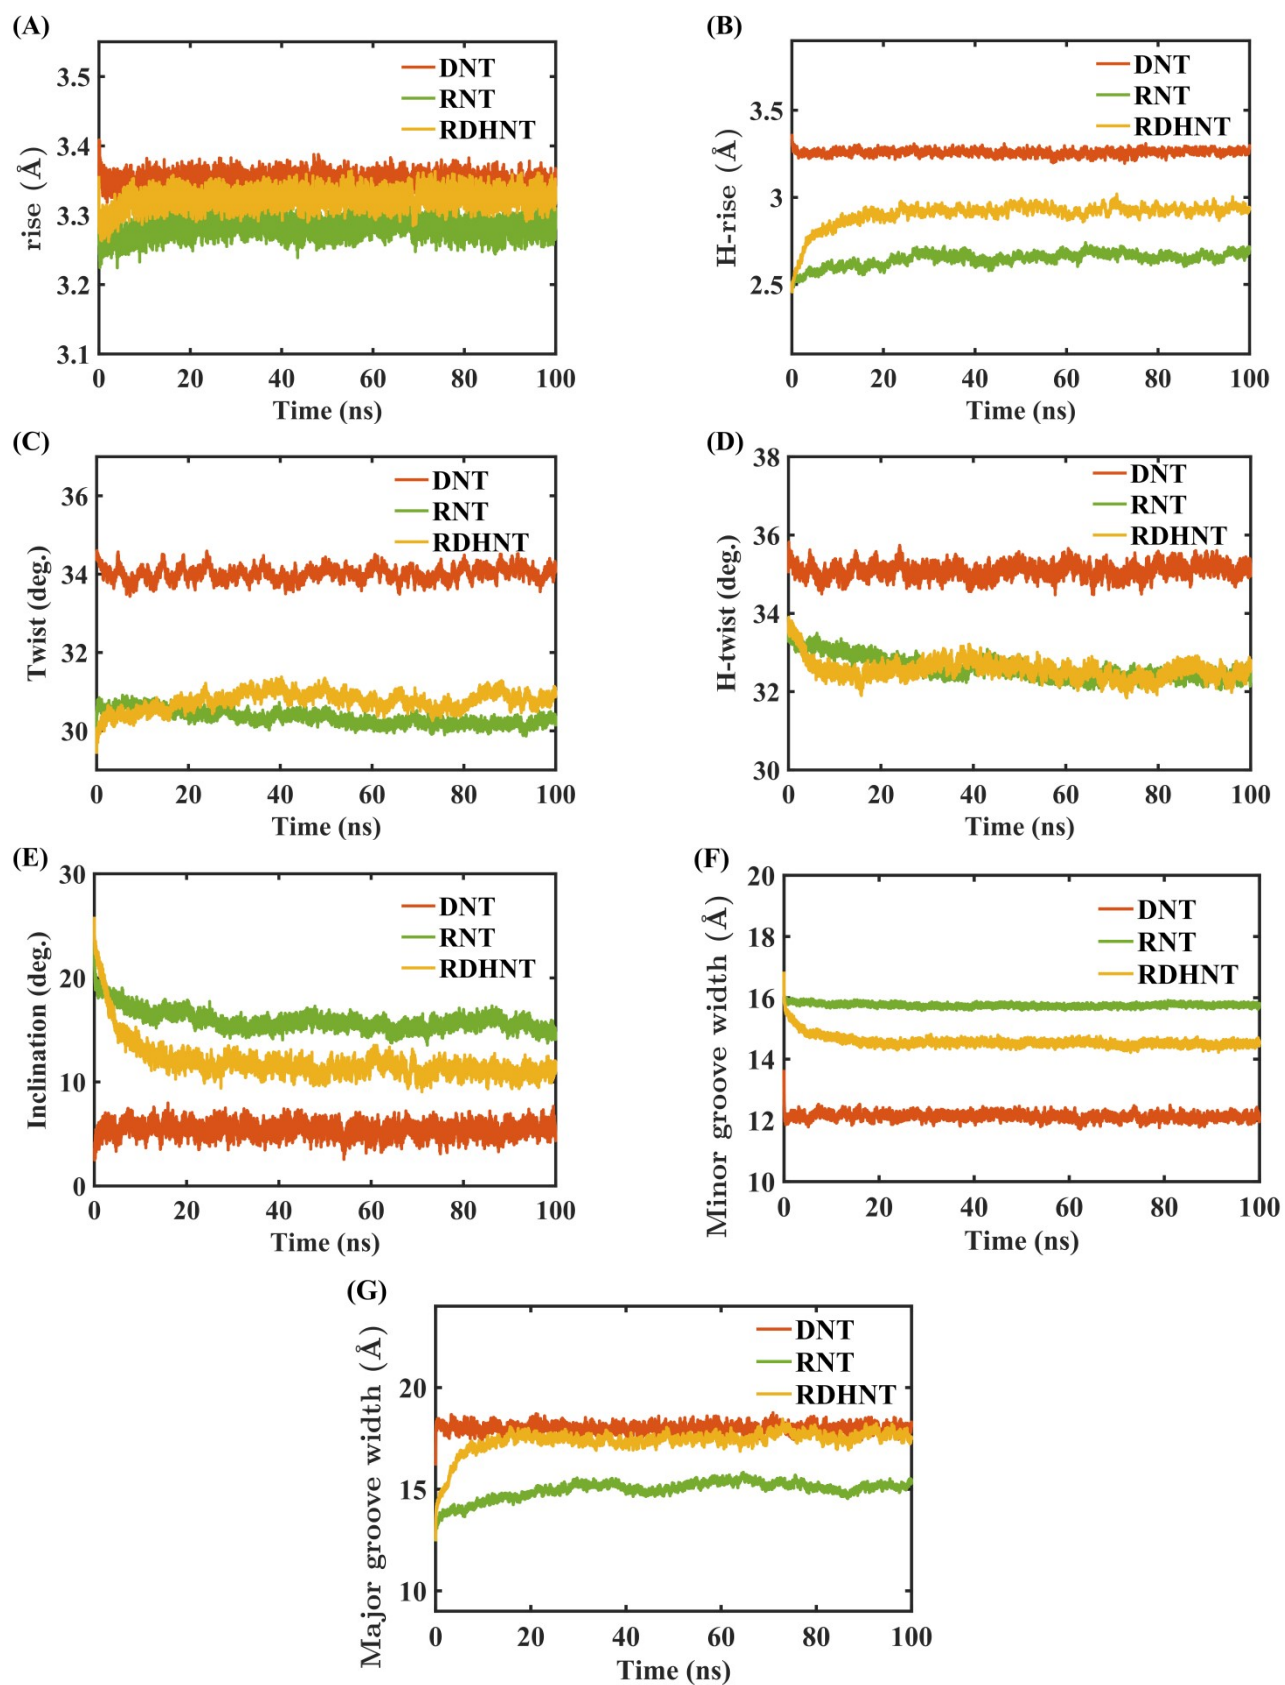

**Figure S10** The time evolutions of base pair morphology and groove parameters, including (A) rise, (B) H-rise, (C) twist, (D) H-twist, (E) inclination, (F) minor groove width, and (G) major groove width.

**Table S4** The average values of base pair morphology and groove parameters for the initially built structures of DNT, RNT, and RDHNT. The current table also displays the average values derived from the PDB database for DNA, RNA, and RNA-DNA hybrid duplexes.

| Microscopic parameter  | Initially built structure |       |       | PDB database |                |            |
|------------------------|---------------------------|-------|-------|--------------|----------------|------------|
|                        | DNT                       | RDHNT | RNT   | DNA          | RNA-DNA hybrid | RNA        |
| Rise (Å)               | 3.4                       | 3.29  | 3.29  | 3.36±0.22    | 3.27±0.18      | 3.14±0.16  |
| H-rise (Å)             | 3.35                      | 2.51  | 2.51  | 3.25±0.34    | 2.84±0.24      | 2.54±0.68  |
| Twist (deg.)           | 34.34                     | 29.90 | 29.90 | 35.85±4.09   | 32.02±3.01     | 31.58±8.57 |
| H-Twist (deg.)         | 35.02                     | 33.49 | 33.49 | 36.09±5.12   | 33.13±1.45     | 32.94±7.49 |
| Inclination (deg.)     | 3.62                      | 24.63 | 24.63 | 3.74±3.99    | 11.33±10.87    | 20.03±8.45 |
| Major groove width (Å) | 17.87                     | 13.04 | 13.04 | 17.34±0.74   | 16.11±1.64     | 13.11±1.2  |
| Minor groove width (Å) | 12.39                     | 16.32 | 16.32 | 10.92±1.5    | 15.18±0.28     | 15.56±0.32 |

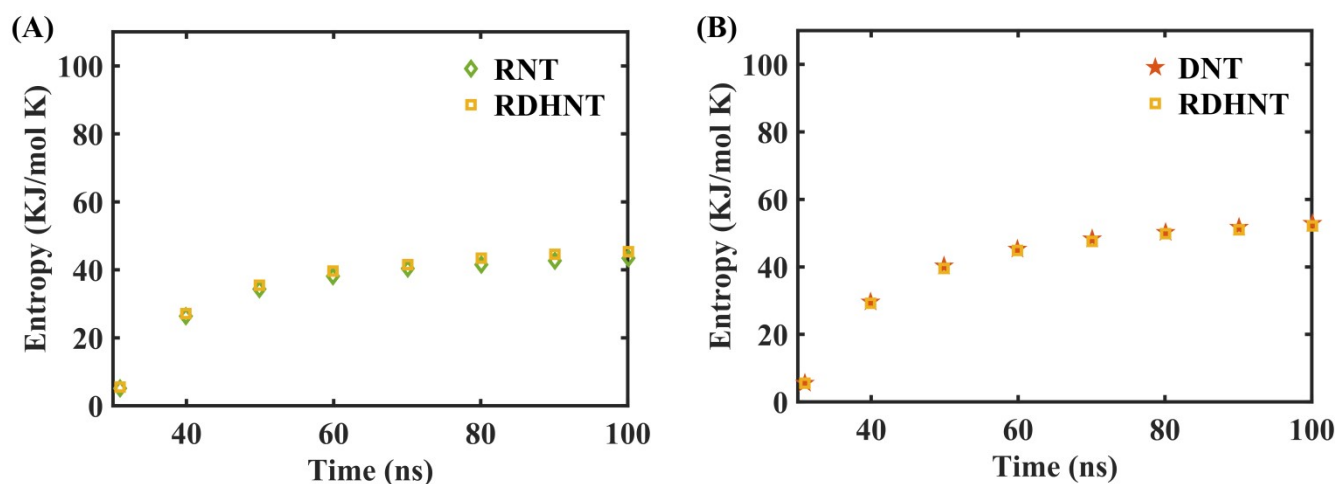

**Figure S11** The temporal evolution entropies of (A) RNA scaffolds in RDHNT and RNT and (B) DNA staples in RDHNT and DNT.

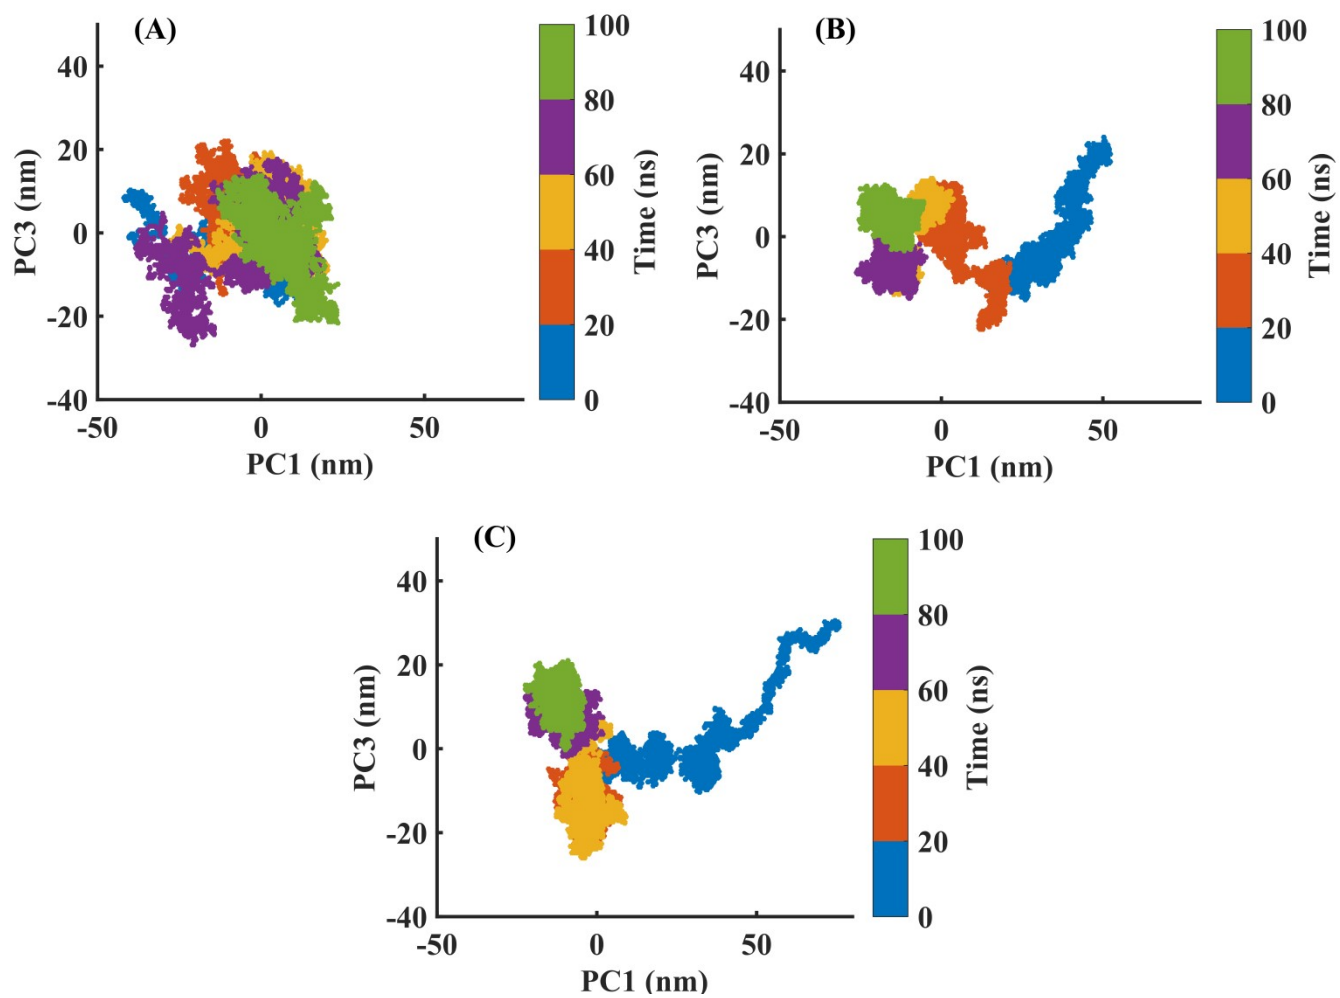

**Figure S12** Projection of trajectories along the first and third principal components in phase space for (A) DNT, (B) RNT, and (C) RDHNT.

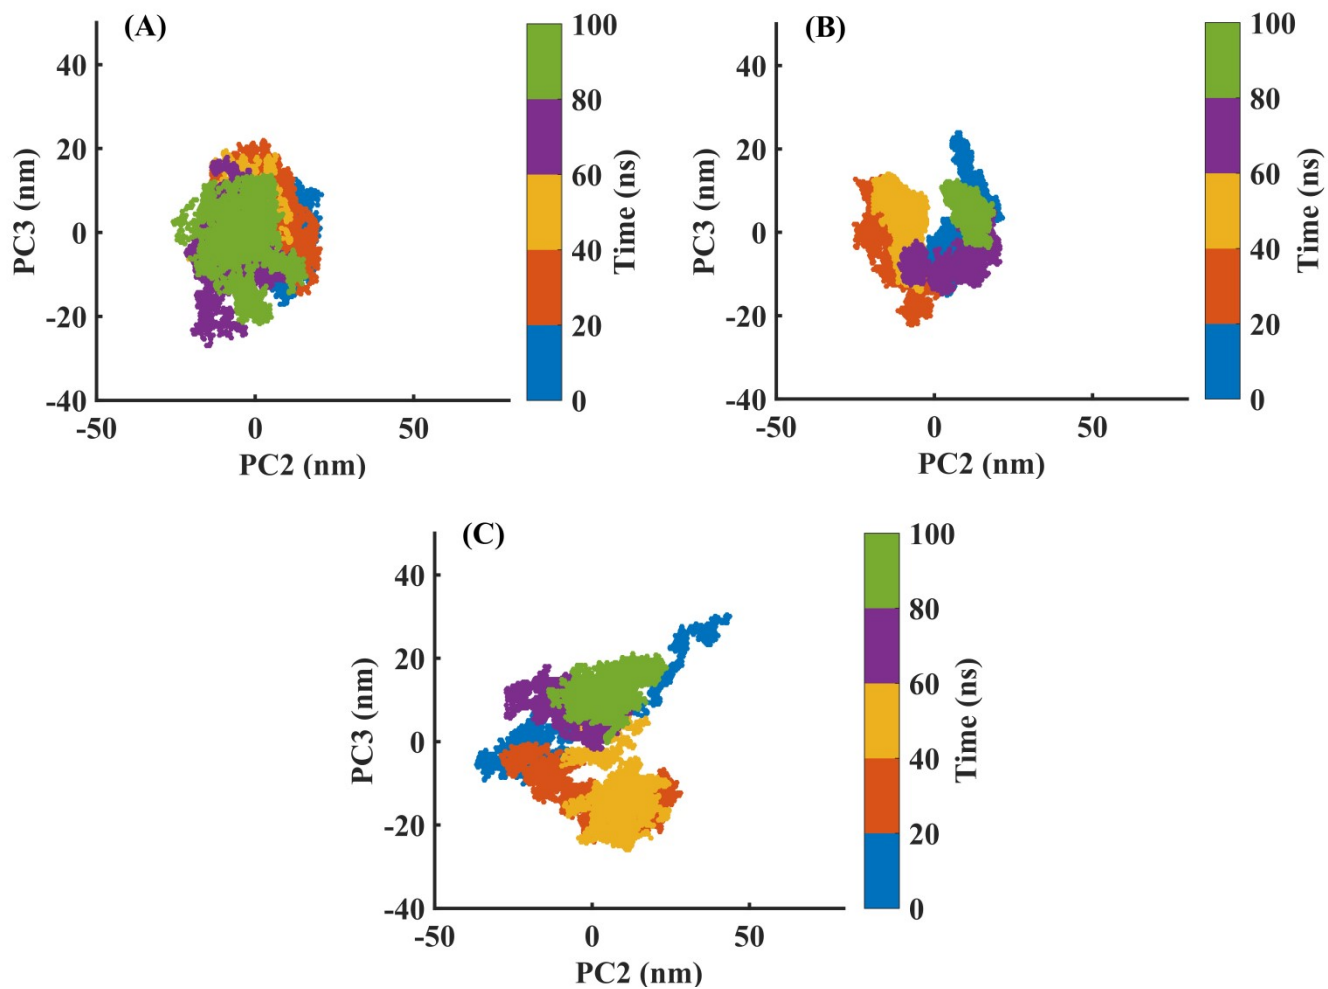

**Figure S13** Projection of trajectories along the second and third principal components in phase space for (A) DNT, (B) RNT, and (C) RDHNT.

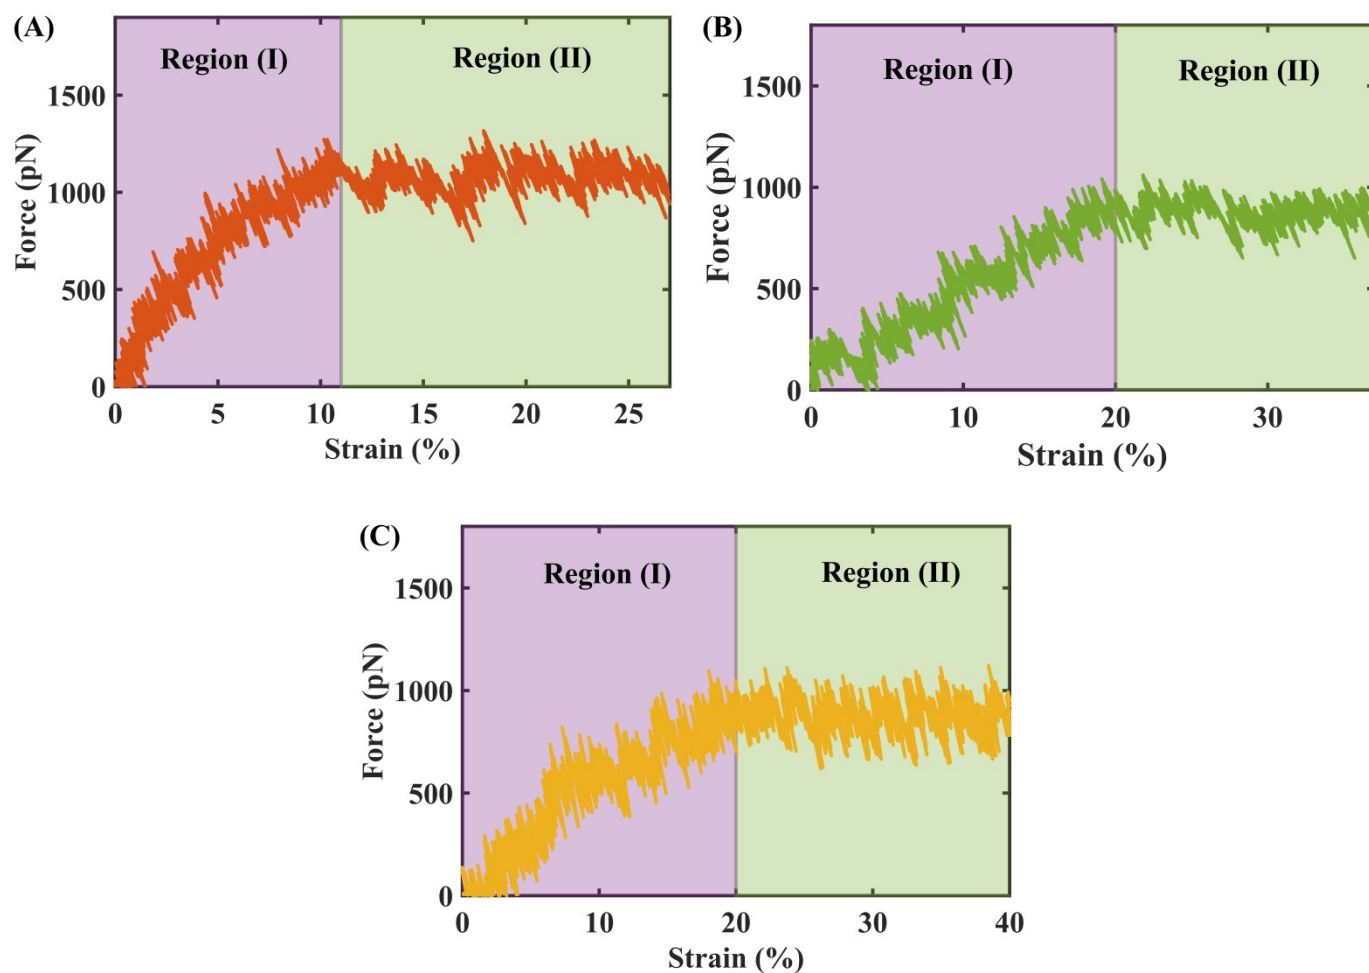

**Figure S14** Force-strain graphs obtained from SMD simulations for (A) DNT, (B) RNT, and (C) RDHNT. A velocity of  $0.0001 \text{ nm.ps}^{-1}$  was used for these simulations.

**Table S5** Tensile stiffness, Young's modulus, yield force, and yield strain obtained from SMD simulations for DNT, RNT, and RDHNT. A velocity of  $0.0001 \text{ nm.ps}^{-1}$  was used for these simulations.

| Structure | Tensile stiffness (pN) | Young's modulus (MPa) | Yield force (pN) | Yield strain (%) |
|-----------|------------------------|-----------------------|------------------|------------------|
| DNT       | $7472 \pm 53$          | $382 \pm 28$          | $1117 \pm 80$    | $11 \pm 1.8$     |
| RDHNT     | $4307 \pm 83$          | $194 \pm 34$          | $881 \pm 50$     | $20 \pm 1.2$     |
| RNT       | $3993 \pm 42$          | $174 \pm 19$          | $886 \pm 95$     | $20 \pm 1.3$     |
